# Supplementary material for: 4000-year-old Mycobacterium lepromatosis genomes from Chile reveal long-establishment of Hansen’s Disease in the Americas
Source: Research Square preprint supplement (doi:10.21203/rs.3.rs-5776739/v1), 2025-05-28
Supplement: Supplementary file 1 [file 046332c540140a1530106638.xlsx]

## Sheet: Supplementary Table S1
Table S1: Archaeological details of the skeletons that yielded M. lepromatosis genomes
ENA Project ID: PRJEB81970
Individual	Skeletal element	Alternative arch ID	Age at death	C14 Date (BP)	Calibrated Date (BCE)	ENA Sample ID	ENA Dataset ID
ECR001	ECR001.C0101	Caja 362, Individuo 1	35-39	4350 ± 17	2419 - 1890	ERS21392103	ERR13916540
ECR003	ECR003.A0101	Caja 315, Individuo 1	40-44	4201 ± 17	2209 - 1685	ERS21392104	ERR13916541

## Sheet: Supplementary Table S2
Table S2 - mapping of ECR001 and ECR003 non-enrriched data against the M. lepromatosis reference FJ924 (NZ_CP083405.1)
Sample Name	Nr. Input Reads	Length Input Reads	% GC Input Reads	% Trimmed	Nr. Processed Reads	Length Processed Reads	% GC Processed Reads	Nr. Reads Into Mapping	Nr. Mapped Reads	Endogenous DNA (%)	Nr. Mapped Reads Passed Post-Filter	Endogenous DNA Post (%)	% Dup. Mapped Reads	5 Prime C>T 1st base	5 Prime C>T 2nd base	Mean Length Mapped Reads	Median read length	Nr. Dedup. Mapped Reads	Mean cov	Median cov	≥ 1X	≥ 2X	≥ 3X	≥ 4X	≥ 5X	% GC Dedup. Mapped Reads	% Discarded
ECR001
ECR001.C0101.SG1								4,472,180	6.063	0.14	5.061	0.11	11.8%	21.7%	10.0%	51.26bp	49.00bp	4.466	0.1X	0.0X	6.5%	0.3%	0.0%	0.0%	0.0%	0.56
ECR001.C0101.SG1.1_S0_L005_R1_001	6,307,551	76 bp	0.57	92.0%	4,472,180	50 bp	0.6																				29.1%
ECR003
ECR003.A0101.SG1								3,262,510	100.689	3.09	84.325	2.58	9.4%	25.2%	10.6%	48.99bp	46.00bp	76.383	1.1X	1.0X	66.3%	31.9%	11.7%	3.4%	0.8%	0.55
ECR003.A0101.SG1.1_S0_L005_R1_001	5,479,881	76 bp	0.53	94.8%	3,262,510	47 bp	0.57																				40.5%

## Sheet: Supplementary Table S3
Table S3: Competitive mapping of M. leprae captured dataset against a multi-reference fasta containing all representative genomes of the genus Mycobacteria
M. lepromatosis (mapping shown in green) is the candidate with the highest coverage, and the only candidate with near complete genome coverage
Sample	Target genome	Reference Accession	startpos	endpos	numreads	covbases	coverage	meandepth	meanbaseq	meanmapq
ECR001.C0101	Mycobacterium lepromatosis FJ924	NZ_CP083405.1	1	3271694	1745513	2900834	88.6646	42.3079	40.5	37
	Mycobacterium gallinarum JCM 6399	NZ_AP022601.1	1	6090007	1134	25581	0.420049	0.0123831	40.6	37
	Mycobacterium dioxanotrophicus PH-06	NZ_CP020809.1	1	7595921	652	17351	0.228425	0.00521741	40.7	37
	Mycobacterium leprae MRHRU-235-G	NZ_CP029543.1	1	3187112	299	13315	0.417776	0.0048922	40.7	37
	Mycobacterium adipatum YC-RL4	NZ_CP015596.1	1	5801417	427	11844	0.204157	0.00409228	40.8	37
	Mycobacterium novum JCM 6391	NZ_AP022562.1	1	4458926	416	9190	0.206103	0.00551882	40.8	37
	Mycobacterium branderi JCM 12687	NZ_AP022606.1	1	5115366	273	7024	0.137312	0.00314191	40.8	37
	Mycobacterium saskatchewanense JCM 13016	NZ_AP022573.1	1	6008916	183	6394	0.106409	0.00162642	40.8	37
	Mycobacterium avium subsp. hominissuis OCU889s P11 4s	NZ_CP018019.1	1	5118245	211	6316	0.123402	0.00272613	40.6	37
	Mycobacterium cookii JCM 12404	NZ_AP022569.1	1	5318517	216	6141	0.115465	0.00245689	40.8	37
	Mycobacterium conspicuum JCM 14738	NZ_AP022613.1	1	6237139	149	5988	0.0960056	0.0013721	40.7	37
	Mycobacterium parmense JCM 14742	NZ_AP022614.1	1	5952912	222	5875	0.0986912	0.00213442	40.8	37
	Mycobacterium paragordonae 49061	NZ_CP025546.1	1	6730319	199	5532	0.0821952	0.00170854	40.8	37
	Mycobacterium noviomagense JCM 16367	NZ_AP022583.1	1	4779798	250	5474	0.114524	0.00301896	40.8	37
	Mycobacterium heidelbergense JCM 14842	NZ_AP022615.1	1	5050576	134	4880	0.0966226	0.00161091	40.8	37
	Mycobacterium shigaense JCM 32072	NZ_AP018164.1	1	5232660	189	4756	0.0908907	0.00213563	40.8	37
	Mycobacterium paraterrae DSM 45127	NZ_CP092488.2	1	5522624	178	4630	0.083837	0.0018283	40.9	37
	Mycobacterium malmoense ATCC 29571	NZ_CP080999.1	1	5319859	145	4595	0.0863745	0.0016226	40.7	37
	Mycobacterium simiae JCM 12377	NZ_AP022568.1	1	5788994	101	4472	0.07725	0.000980481	40.7	37
	Mycobacterium shinjukuense JCM 14233	NZ_AP022575.1	1	4504020	140	4448	0.0987562	0.00198489	40.5	37
	Mycobacterium lacus JCM 15657	NZ_AP022581.1	1	5092988	142	4409	0.08657	0.00154683	40.8	37
	Mycobacterium heckeshornense JMUB5695	NZ_AP024310.1	1	4865109	136	3891	0.0799777	0.00165752	40.7	37
	Mycobacterium mantenii JCM 18113	NZ_AP022590.1	1	6185541	100	3867	0.0625168	0.000946239	40.8	37
	Mycobacterium haemophilum DSM 44634 ATCC 29548	NZ_CP011883.2	1	4235765	177	3548	0.0837629	0.00215593	40.9	37
	Mycobacterium florentinum JCM 14740	NZ_AP022576.1	1	6219859	99	3508	0.0564	0.000845196	40.8	37
	Mycobacterium vicinigordonae 24	NZ_CP059165.1	1	6266765	82	3441	0.0549087	0.000754775	40.6	37
	Mycobacterium seoulense JCM 16018	NZ_AP022582.1	1	5531300	89	3062	0.0553577	0.00103882	40.7	37
	Mycobacterium marseillense FLAC0026	NZ_CP023147.1	1	5266037	63	2781	0.0528101	0.000721605	40.6	37
	Mycobacterium paraseoulense JCM 16952	NZ_AP022619.1	1	6085955	102	2757	0.045301	0.00102104	40.8	37
	Mycobacterium canettii CIPT 140010059	NC_015848.1	1	4482059	127	2538	0.0566258	0.00170033	40.7	37
	Mycobacterium stomatepiae JCM 17783	NZ_AP022587.1	1	6210822	79	2437	0.039238	0.000664002	41	37
	Mycobacterium ostraviense FDAARGOS 1613	NZ_CP089224.1	1	6127734	60	2271	0.037061	0.000534455	40.9	37
	Mycobacterium kansasii ATCC 12478	NC_022663.1	1	6432277	55	2258	0.0351042	0.000459713	40.8	37
	Mycobacterium spongiae FSD4b-SM	NZ_CP046600.1	1	5581157	70	2181	0.0390779	0.000588229	40.9	37
	Mycobacterium basiliense isolate 901379	NZ_LR130759.1	1	5607630	74	2170	0.0386973	0.000725618	40.8	37
	Mycobacterium paraintracellulare M011	NZ_AP024251.1	1	5332910	7	391	0.00733183	7.33183e-05	41	37
	Mycobacterium shottsii JCM 12657	NZ_AP022572.1	1	5973149	8	376	0.00629484	8.87304e-05	40.7	37
	Mycobacterium pseudoshottsii JCM 15466	NZ_AP018410.1	1	6061597	3	187	0.003085	3.29946e-05	40.7	37
	Mycobacterium intracellulare FDAARGOS 1564	NZ_CP085945.1	1	5621211	3	138	0.00245499	2.45499e-05	41	37
	Mycobacterium ulcerans JKD8049	NZ_CP085200.1	1	5627534	2	102	0.00181252	1.81252e-05	41	37
	Mycobacterium marinum E11	NZ_HG917972.2	1	6336293	2	94	0.00148352	2.13058e-05	40.7	37
ECR003.A0101	Mycobacterium lepromatosis FJ924	NZ_CP083405.1	1	3271694	2844671	3112839	95.1446	70.8572	40.4	37
	Mycobacterium leprae MRHRU-235-G	NZ_CP029543.1	1	3187112	779	35185	1.10398	0.0129365	40.7	37
	Mycobacterium haemophilum DSM 44634 ATCC 29548	NZ_CP011883.2	1	4235765	88	3734	0.0881541	0.0010468	41	37
	Mycobacterium gallinarum JCM 6399	NZ_AP022601.1	1	6090007	89	3441	0.0565024	0.000750902	40.9	37
	Mycobacterium dioxanotrophicus PH-06	NZ_CP020809.1	1	7595921	68	2843	0.037428	0.000450373	40.9	37
	Mycobacterium novum JCM 6391	NZ_AP022562.1	1	4458926	53	2374	0.0532415	0.000633112	40.7	37
	Mycobacterium adipatum YC-RL4	NZ_CP015596.1	1	5801417	62	2282	0.0393352	0.000509703	40.9	37
	Mycobacterium noviomagense JCM 16367	NZ_AP022583.1	1	4779798	45	1494	0.0312566	0.000476171	41	37
	Mycobacterium branderi JCM 12687	NZ_AP022606.1	1	5115366	49	1462	0.0285806	0.000449626	41	37
	Mycobacterium conspicuum JCM 14738	NZ_AP022613.1	1	6237139	45	1390	0.0222859	0.000347756	41	37
	Mycobacterium parmense JCM 14742	NZ_AP022614.1	1	5952912	32	1233	0.0207126	0.000268944	40.9	37
	Mycobacterium heckeshornense JMUB5695	NZ_AP024310.1	1	4865109	29	1189	0.0244393	0.000293313	40.6	37
	Mycobacterium simiae JCM 12377	NZ_AP022568.1	1	5788994	35	1152	0.0198998	0.000287269	41	37
	Mycobacterium saskatchewanense JCM 13016	NZ_AP022573.1	1	6008916	31	1063	0.0176904	0.000236482	41	37
	Mycobacterium shigaense JCM 32072	NZ_AP018164.1	1	5232660	26	1045	0.0199707	0.00023812	40.7	37
	Mycobacterium avium subsp. hominissuis OCU889s P11 4s	NZ_CP018019.1	1	5118245	29	1041	0.020339	0.00033195	40.7	37
	Mycobacterium heidelbergense JCM 14842	NZ_AP022615.1	1	5050576	25	1007	0.0199383	0.000260564	40.8	37
	Mycobacterium canettii CIPT 140010059	NC_015848.1	1	4482059	22	921	0.0205486	0.000250108	41	37
	Mycobacterium cookii JCM 12404	NZ_AP022569.1	1	5318517	25	917	0.0172416	0.000225251	41	37
	Mycobacterium malmoense ATCC 29571	NZ_CP080999.1	1	5319859	32	875	0.0164478	0.000285534	41	37
	Mycobacterium paraterrae DSM 45127	NZ_CP092488.2	1	5522624	24	848	0.015355	0.000197913	41	37
	Mycobacterium vicinigordonae 24	NZ_CP059165.1	1	6266765	18	837	0.0133562	0.000133562	41	37
	Mycobacterium lacus JCM 15657	NZ_AP022581.1	1	5092988	23	796	0.0156293	0.000207344	41	37
	Mycobacterium paragordonae 49061	NZ_CP025546.1	1	6730319	20	761	0.011307	0.000150513	40.8	37
	Mycobacterium shinjukuense JCM 14233	NZ_AP022575.1	1	4504020	16	670	0.0148756	0.000183392	40.7	37
	Mycobacterium mantenii JCM 18113	NZ_AP022590.1	1	6185541	14	594	0.00960304	9.6e-05	41	37
	Mycobacterium florentinum JCM 14740	NZ_AP022576.1	1	6219859	16	581	0.00934105	0.000133122	40.9	37
	Mycobacterium spongiae FSD4b-SM	NZ_CP046600.1	1	5581157	13	542	0.00971125	0.000106071	41	37
	Mycobacterium kansasii ATCC 12478	NC_022663.1	1	6432277	14	534	0.00830188	8.88e-05	41	37
	Mycobacterium marseillense FLAC0026	NZ_CP023147.1	1	5266037	10	499	0.00947582	9.48e-05	40.9	37
	Mycobacterium paraseoulense JCM 16952	NZ_AP022619.1	1	6085955	9	414	0.00680255	6.8e-05	41	37
	Mycobacterium seoulense JCM 16018	NZ_AP022582.1	1	5531300	8	382	0.00690615	6.91e-05	41	37
	Mycobacterium stomatepiae JCM 17783	NZ_AP022587.1	1	6210822	9	347	0.00558702	6.18e-05	41	37
	Mycobacterium ostraviense FDAARGOS 1613	NZ_CP089224.1	1	6127734	6	318	0.00518952	5.19e-05	40.6	37
	Mycobacterium paraintracellulare M011	NZ_AP024251.1	1	5332910	6	232	0.00435035	5.59e-05	41	37
	Mycobacterium shottsii JCM 12657	NZ_AP022572.1	1	5973149	2	159	0.00266191	2.66e-05	40.6	37
	Mycobacterium pseudoshottsii JCM 15466	NZ_AP018410.1	1	6061597	1	67	0.00110532	1.11e-05	41	37
	Mycobacterium ulcerans JKD8049	NZ_CP085200.1	1	5627534	1	35	0.000621942	6.22e-06	41	37
	Mycobacterium intracellulare FDAARGOS 1564	NZ_CP085945.1	1	5621211	1	34	0.000604852	6.05e-06	41	37

## Sheet: Supplementary Table S4
Table S4: Mapping results of ECR001 and ECR003 M. leprae captured datasets against M. lepromatosis FJ924 (NZ_CP083405.1)
Sample Name	Nr. Input Reads	Length Input Reads	% GC Input Reads	% Trimmed	Nr. Processed Reads	Length Processed Reads	% GC Processed Reads	Nr. Reads Into Mapping	Nr. Mapped Reads	Endogenous DNA (%)	Endogenous DNA from shotgun (%)	Enrichment factor	Nr. Mapped Reads Passed Post-Filter	Endogenous DNA Post (%)	% Dup. Mapped Reads	5 Prime C>T 1st base	5 Prime C>T 2nd base	Mean Length Mapped Reads	Median read length	Nr. Dedup. Mapped Reads	Mean cov	Median cov	≥ 1X	≥ 2X	≥ 3X	≥ 4X	≥ 5X	% GC Dedup. Mapped Reads	Nr. Overall Variants	Nr. SNPs	Nr. InDels	Ts/Tv
ECR001											0.14%	278.857																	3271694	12635	0	61.24
ECR001.C0101.ML1.1.Data								16698767	6518919	39.04%			5899075	35.33	0.674	0.249	0.109	76.86bp	76.00bp	1920324	45.1X	44.0X	0.887	0.859	0.842	0.829	0.817	0.58
ECR001.C0101.ML1.1_S0_L003_R1_001	1042200	76 bp	0.57	0.989	905405	61 bp	0.59
ECR001.C0101.ML1.1_S0_L003_R2_001	1042200	76 bp	0.58
ECR001.C0101.ML1.1_S0_L004_R1_001	5051352	76 bp	0.57	0.988	4438218	62 bp	0.59
ECR001.C0101.ML1.1_S0_L004_R2_001	5051352	76 bp	0.58
ECR001.C0101.ML1.1_S0_L005_R1_001	5148119	76 bp	0.57	0.989	4504690	62 bp	0.59
ECR001.C0101.ML1.1_S0_L005_R2_001	5148119	76 bp	0.58
ECR001.C0101.ML1.1_S0_L006_R1_001	5268395	76 bp	0.57	0.987	4662081	62 bp	0.59
ECR001.C0101.ML1.1_S0_L006_R2_001	5268395	76 bp	0.58
ECR001.C0101.ML1.1_S0_L007_R1_001	2461536	76 bp	0.57	0.987	2188373	63 bp	0.59
ECR001.C0101.ML1.1_S0_L007_R2_001	2461536	76 bp	0.58
ECR003											3.09%	22.6667																	3271694	16916	0	88.51
ECR003.A0101.ML1.1.Data								19850310	13903022	70.04%			12260803	61.77	0.752	0.282	0.12	79.71bp	76.00bp	3044362	74.2X	79.0X	0.952	0.927	0.903	0.884	0.87	0.58
ECR003.A0101.ML1.1_S0_L003_R1_001	1317107	76 bp	0.54	0.993	1116276	59 bp	0.56
ECR003.A0101.ML1.1_S0_L003_R2_001	1317107	76 bp	0.56
ECR003.A0101.ML1.1_S0_L004_R1_001	6287859	76 bp	0.54	0.993	5377001	59 bp	0.56
ECR003.A0101.ML1.1_S0_L004_R2_001	6287859	76 bp	0.56
ECR003.A0101.ML1.1_S0_L005_R1_001	6313223	76 bp	0.54	0.993	5375694	59 bp	0.56
ECR003.A0101.ML1.1_S0_L005_R2_001	6313223	76 bp	0.56
ECR003.A0101.ML1.1_S0_L006_R1_001	6334396	76 bp	0.54	0.993	5446729	60 bp	0.56
ECR003.A0101.ML1.1_S0_L006_R2_001	6334396	76 bp	0.56
ECR003.A0101.ML1.1_S0_L007_R1_001	2936793	76 bp	0.54	0.992	2534610	60 bp	0.56
ECR003.A0101.ML1.1_S0_L007_R2_001	2936793	76 bp	0.56

## Sheet: Supplemental Table S5
Table S5 - Mapping of M. leprae captured data to the human mitochondrial rCRS (NC_012920.1)
Sample Name	Nr. Input Reads	Length Input Reads	% GC Input Reads	% Trimmed	Nr. Reads Into Mapping	Nr. Mapped Reads	Endogenous DNA (%)	Nr. Mapped Reads Passed Post-Filter	Endogenous DNA Post (%)	% Dup. Mapped Reads	5 Prime C>T 1st base	5 Prime C>T 2nd base	Mean Length Mapped Reads	Median read length	Nr. Dedup. Mapped Reads	Mean cov	Median cov	≥ 1X	≥ 2X	≥ 3X	≥ 4X	≥ 5X	% GC Dedup. Mapped Reads
ECR001															1.101	3.6X	3.0X	90.7 %	74.8 %	57.4 %	42.5 %	30.6 %	0.45
ECR001.A0101.SG1					2,916,606	111	0.00	70	0.00	12.9 %	5.9 %	4.3 %	43.63 bp	41.00 bp
ECR001.A0101.SG1.1_S0_L001_R1_001	4,434,653	76 bp	0.54	92.4 %
ECR001.A0101.SG1.1_S0_L002_R1_001	1,151,408	76 bp	0.54	92.5 %
ECR001.B0101.SG1					3,752,732	16	0.00	7	0.00	14.3 %	0.0 %	0.0 %	41.82 bp	38.00 bp
ECR001.B0101.SG1.1_S0_L005_R1_001	5,890,391	76 bp	0.58	95.3 %
ECR001.C0101.ML1					15,951,717	1.37	0.01	1.226	0.01	16.1 %	8.5 %	8.7 %	57.46 bp	52.00 bp
ECR001.C0101.ML1.1_S0_L003_R1_001	1,042,200	76 bp	0.57	98.9 %
ECR001.C0101.ML1.1_S0_L003_R2_001	1,042,200	76 bp	0.58
ECR001.C0101.ML1.1_S0_L004_R1_001	5,051,352	76 bp	0.57	98.8 %
ECR001.C0101.ML1.1_S0_L004_R2_001	5,051,352	76 bp	0.58
ECR001.C0101.ML1.1_S0_L005_R1_001	5,148,119	76 bp	0.57	98.9 %
ECR001.C0101.ML1.1_S0_L005_R2_001	5,148,119	76 bp	0.58
ECR001.C0101.ML1.1_S0_L006_R1_001	5,268,395	76 bp	0.57	98.7 %
ECR001.C0101.ML1.1_S0_L006_R2_001	5,268,395	76 bp	0.58
ECR001.C0101.ML1.1_S0_L007_R1_001	2,461,536	76 bp	0.57	98.7 %
ECR001.C0101.ML1.1_S0_L007_R2_001	2,461,536	76 bp	0.58
ECR001.C0101.SG1					4,467,825	16	0.00	6	0.00	16.7 %	0.0 %	0.0 %	37.80 bp	32.00 bp
ECR001.C0101.SG1.1_S0_L005_R1_001	6,307,551	76 bp	0.57	92.6 %
ECR003															821	2.4X	2.0X	83.5 %	61.4 %	40.7 %	24.3 %	14.2 %	0.46
ECR003.A0101.ML1					19,311,764	1.097	0.01	897	0.00	11.0 %	0.6 %	0.6 %	50.68 bp	46.00 bp
ECR003.A0101.ML1.1_S0_L003_R1_001	1,317,107	76 bp	0.54	99.3 %
ECR003.A0101.ML1.1_S0_L003_R2_001	1,317,107	76 bp	0.56
ECR003.A0101.ML1.1_S0_L004_R1_001	6,287,859	76 bp	0.54	99.3 %
ECR003.A0101.ML1.1_S0_L004_R2_001	6,287,859	76 bp	0.56
ECR003.A0101.ML1.1_S0_L005_R1_001	6,313,223	76 bp	0.54	99.3 %
ECR003.A0101.ML1.1_S0_L005_R2_001	6,313,223	76 bp	0.56
ECR003.A0101.ML1.1_S0_L006_R1_001	6,334,396	76 bp	0.54	99.3 %
ECR003.A0101.ML1.1_S0_L006_R2_001	6,334,396	76 bp	0.56
ECR003.A0101.ML1.1_S0_L007_R1_001	2,936,793	76 bp	0.54	99.2 %
ECR003.A0101.ML1.1_S0_L007_R2_001	2,936,793	76 bp	0.56
ECR003.A0101.SG1					3,258,311	60	0.00	26	0.00	11.5 %	0.0 %	0.0 %	41.90 bp	38.00 bp
ECR003.A0101.SG1.1_S0_L005_R1_001	5,479,881	76 bp	0.53	95.1 %

## Sheet: Supplementary Table S6
Table S6: Mapping of extraction blanks and library controls related to ECR001 and ECR003 against the M. lepromatosis reference
Sample Name	Nr. Input Reads	Length Input Reads	% GC Input Reads	% Trimmed	Nr. Processed Reads	Length Processed Reads	% GC Processed Reads	Nr. Reads Into Mapping	Nr. Mapped Reads	Endogenous DNA (%)	Nr. Mapped Reads Passed Post-Filter	Endogenous DNA Post (%)
EXB030.A2501								4849	0	0	0	0
EXB030.A2501.SG1.1_S0_L001_R1_001	272038	76 bp	0.49	0.992	4849	72 bp	0.5
EXB030.A2501.SG1.1_S0_L001_R2_001	272038	76 bp	0.52
EXB030.A2601								7349	0	0	0	0
EXB030.A2601.SG1.1_S0_L001_R1_001	302159	76 bp	0.5	0.99	7349	71 bp	0.49
EXB030.A2601.SG1.1_S0_L001_R2_001	302159	76 bp	0.48
LNC001.A44701								16070	0	0	0	0
LNC001.A44701.SG1.1_S0_L005_R1_001	360774	76 bp	0.48	0.995	16070	44 bp	0.51
EXB = Extraction Blanks
LNC = Library Control

## Sheet: Supplementary Table 7
Table S7: Modern genomes included in this study
Taxonomic ID	Database	RefSeq	Publication name	DOI
Mycobacterium lepromatosis FJ924	NCBI RefSeq:	NZ_CP083405.1	Han et al. 2015	https://doi.org/10.1128/genomea.00513-15
Mycobacterium lepromatosis strain Mx1-22A	NCBI SRA:	SAMN02900753	Singh et al. 2015	https://doi.org/10.1073/pnas.1421504112
Mycobacterium lepromatosis PL-02	NCBI SRA:	SAMN05251107
Mycobacterium lepromatosis NHDP-385	NCBI SRA:	SAMN12872980
Mycobacterium lepromatosis from red squirrel M1960/270411, tail	NCBI SRA:	SAMN05251188	Avanzi et al. 2016	https://doi.org/10.1126/science.aah3783
Mycobacterium lepromatosis from red squirrel R13/11, pinna	NCBI SRA:	SAMN05251189	Avanzi et al. 2016	https://doi.org/10.1126/science.aah3783
Mycobacterium lepromatosis from red squirrel R23/12, hindlimb	NCBI SRA:	SAMN05251191	Avanzi et al. 2016	https://doi.org/10.1126/science.aah3783
Mycobacterium lepromatosis from red squirrel R30/13, muzzle	NCBI SRA:	SAMN05251194	Avanzi et al. 2016	https://doi.org/10.1126/science.aah3783
Mycobacterium lepromatosis from red squirrel Ir36, hindlimb	NCBI SRA:	SAMN05251197	Avanzi et al. 2016	https://doi.org/10.1126/science.aah3783
Mycobacterium lepromatosis from red squirrel R30/13, pinna	NCBI SRA:	SAMN05251192	Avanzi et al. 2016	https://doi.org/10.1126/science.aah3783
Mycobacterium lepromatosis from red squirrel M406616, muzzle	NCBI SRA:	SAMN05251195	Avanzi et al. 2016	https://doi.org/10.1126/science.aah3783
Mycobacterium lepromatosis from red squirrel M1960/270411, pinna	NCBI SRA:	SAMN05251187	Avanzi et al. 2016	https://doi.org/10.1126/science.aah3783
Mycobacterium lepromatosis from red squirrel R13/11, muzzle	NCBI SRA:	SAMN05251190	Avanzi et al. 2016	https://doi.org/10.1126/science.aah3783
Mycobacterium lepromatosis from red squirrel R30/13, hindlimb	NCBI SRA:	SAMN05251193	Avanzi et al. 2016	https://doi.org/10.1126/science.aah3783
Mycobacterium lepromatosis from red squirrel Ir25, hindlimb	NCBI SRA:	SAMN05251196	Avanzi et al. 2016	https://doi.org/10.1126/science.aah3783
Mycobacterium lepromatosis FJ924 S 4	NCBI SRA:	SAMN39327841	Avanzi et al. 2016	https://doi.org/10.1126/science.aah3783
Mycobacterium leprae MRHRU-235-G	NCBI RefSeq:	NZ_CP029543.1	Schuenemann et al. 2013	https://doi.org/10.1126/science.1238286

## Sheet: Supplementary Table S8
Table S8: Mapping of modern M. lepromatosis datasets against M. lepromatosis FJ924 (NZ_CP083405.1)
Sample Name	Nr. Input Reads	Length Input Reads	% GC Input Reads	% Trimmed	Nr. Processed Reads	Length Processed Reads	% GC Processed Reads	Nr. Reads Into Mapping	Nr. Mapped Reads	Endogenous DNA (%)	Nr. Mapped Reads Passed Post-Filter	Endogenous DNA Post (%)	% Dup. Mapped Reads	5 Prime C>T 1st base	5 Prime C>T 2nd base	Mean Length Mapped Reads	Median read length	Nr. Dedup. Mapped Reads	Mean cov	Median cov	≥ 1X	≥ 2X	≥ 3X	≥ 4X	≥ 5X	% GC Dedup. Mapped Reads
Avanzi_2016_Ir25_SRR3672750	68186707	101 bp	0.53	0.504	63537806	91 bp	0.54	63537806	1035658	1.63	949031	1.49	0.416	0.002	0.002	97.15bp	101.00bp	554599	16.5X	17.0X	0.966	0.965	0.964	0.962	0.96	0.57
Avanzi_2016_Ir36_SRR3672751	37346118	101 bp	0.5	0.458	35442523	92 bp	0.5	35442523	1800879	5.08	1667250	4.7	0.3	0.002	0.003	95.56bp	101.00bp	1167542	34.1X	35.0X	0.966	0.965	0.965	0.965	0.965	0.58
Avanzi_2016_M1960-270411_SRR3672740	3374146	101 bp	0.49	0.218	3347011	98 bp	0.49	3347011	1489263	44.5	1438074	42.97	0.251	0.001	0.001	99.46bp	101.00bp	1622168	49.3X	51.0X	0.967	0.967	0.967	0.967	0.967	0.58
Avanzi_2016_M1960-270411_SRR3672741	4414129	101 bp	0.54	0.229	4305359	98 bp	0.55	4305359	719901	16.72	694129	16.12	0.215	0.001	0.001	99.43bp	101.00bp
R13-11																		2367361	221.6X	221.0X	0.986	0.986	0.985	0.985	0.985	0.56
Avanzi_2016_R13-11_SRR3672743								1827531	1614041	88.32	1559441	85.33	0.185	0	0.001	315.16bp	281.00bp
SRR3672743_1	1531726	251 bp	0.54	0.85	1827531	300 bp	0.55
SRR3672743_2	1531726	251 bp	0.55
Avanzi_2016_R13-11_SRR3672744								1603001	1375517	85.81	1323910	82.59	0.172	0	0.001	295.76bp	251.00bp
SRR3672744_1	1390949	251 bp	0.54	0.88	1603001	281 bp	0.55
SRR3672744_2	1390949	251 bp	0.54
Avanzi_2016_R23-12_SRR3672742	107318438	101 bp	0.56	0.212	107050859	99 bp	0.56	107050859	105407236	98.46	101588501	94.9	0.965	0	0	100.33bp	101.00bp	3535909	108.4X	112.0X	0.967	0.967	0.967	0.967	0.967	0.58
R30-13																		2368095	213.1X	222.0X	0.986	0.986	0.985	0.985	0.984	0.57
Avanzi_2016_R30-13_SRR3672745								945401	203694	21.55	196583	20.79	0.027	0	0.001	277.73bp	311.00bp
SRR3672745_1	935845	251 bp	0.42	0.989	945401	265 bp	0.42
SRR3672745_2	935845	251 bp	0.43
Avanzi_2016_R30-13_SRR3672746								1736081	1235927	71.19	1195989	68.89	0.127	0	0	294.16bp	320.00bp
SRR3672746_1	1695170	251 bp	0.52	0.98	1736081	280 bp	0.53
SRR3672746_2	1695170	251 bp	0.52
Avanzi_2016_R30-13_SRR3672747								1960735	1420052	72.42	1366903	69.71	0.171	0	0.001	297.41bp	289.00bp
SRR3672747_1	1803635	251 bp	0.52	0.93	1960735	288 bp	0.53
SRR3672747_2	1803635	251 bp	0.53
M_lepromatosis_FJ924_S_4_SAMN39327841-SRR27533696								411852257	3903	0	2033	0	0.247	0.008	0.031	164.14bp	162.00bp	1530	0.1X	0.0X	0.037	0.016	0.009	0.005	0.003	0.61
SRR27533696_1	516677549	150 bp	0.41	0.851	411852257	202 bp	0.41
SRR27533696_2	516677549	150 bp	0.41
M_lepromatosis_NHDP-385_SAMN12872980	88779016	101 bp	0.44	0.411	88495885	92 bp	0.43	19155558	2152281	11.24	2018001	10.53	0.51	0	0.001	337.59bp	332.00bp	988632	102.0X	96.0X	0.988	0.987	0.986	0.986	0.985	0.58
M_lepromatosis_PL-02_SAMN05251107-SRR10202659	14935306	101 bp	0.55	0.247	14828905	98 bp	0.55	14828905	13099483	88.34	12657261	85.36	0.729	0.001	0.001	99.86bp	101.00bp	3425582	104.6X	107.0X	0.967	0.967	0.967	0.967	0.967	0.58
M_lepromatosis_strain_Mx1-22A																		3626037	77.6X	70.0X	0.971	0.969	0.968	0.967	0.967	0.59
M_lepromatosis_strain_Mx1-22A_SRR1576832	239158473	101 bp	0.5	0.486	236618544	88 bp	0.49	236618544	7574510	3.2	7126207	3.01	0.891	0.005	0.006	87.57bp	99.00bp
M_lepromatosis_strain_Mx1-22A_SRR1576989								133920386	141868	0.11	130140	0.1	0.018	0.009	0.013	79.41bp	73.00bp
SRR1576989_1	123318799	101 bp	0.42	0.877	133920386	111 bp	0.41
SRR1576989_2	123318799	101 bp	0.42
M_lepromatosis_strain_Mx1-22A_SRR1578059								88495885	123442	0.14	117654	0.13	0.018	0.008	0.009	69.57bp	67.00bp
SRR10202659_1	16919454	263 bp	0.41	0.889	19155558	309 bp	0.41
SRR10202659_2	16919454	265 bp	0.41
M_lepromatosis_strain_Mx1-22A_SRR1578060								279521572	350316	0.13	333300	0.12	0.043	0.009	0.011	82.10bp	76.00bp
SRR1578060_1	249077348	101 bp	0.43	0.894	279521572	113 bp	0.42
SRR1578060_2	249077348	101 bp	0.43
M_lepromatosis_strain_Mx1-22A_SRR1578063	274417090	101 bp	0.47	0.777	267009710	72 bp	0.46	267009710	1772475	0.66	1666085	0.62	0.329	0.011	0.012	52.93bp	48.00bp
M_lepromatosis_strain_Mx1-22A_SRR1578064	252465010	101 bp	0.46	0.743	249141483	76 bp	0.44	249141483	1273615	0.51	1191148	0.48	0.239	0.011	0.017	56.94bp	51.00bp
M_lepromatosis_strain_Mx1-22A_SRR1596317								15794506	481717	3.05	454632	2.88	0.423	0.004	0.005	116.83bp	107.00bp
SRR1596317_1	15312430	150 bp	0.51	0.946	15794506	119 bp	0.51
SRR1596317_2	15312430	150 bp	0.52

## Sheet: Supplementary Table S9
Table S9: Comparison of reference-based mappings for putative M. lepromatosis data from Singh et al. 2023
Table S9a: Mapping results against Mycobacterium_lepromatosis_strain_FJ924_CP083405.1
Sample Name	Nr. Input Reads	Length Input Reads	% GC Input Reads	% Trimmed	Nr. Processed Reads	Length Processed Reads	% GC Processed Reads	Nr. Reads Into Mapping	Nr. Mapped Reads	Endogenous DNA (%)	Nr. Mapped Reads Passed Post-Filter	Endogenous DNA Post (%)	% Dup. Mapped Reads	5 Prime C>T 1st base	5 Prime C>T 2nd base	Mean Length Mapped Reads	Median read length	Nr. Dedup. Mapped Reads	Mean cov	Median cov	≥ 1X	≥ 2X	≥ 3X	≥ 4X	≥ 5X	% GC Dedup. Mapped Reads
M_lepromatosis_FJ924_S_4_SAMN39327841-SRR27533696								411852257	3903	0	2033	0	0.247	0.008	0.031	164.14bp	162.00bp	1530	0.1X	0.0X	0.037	0.016	0.009	0.005	0.003	0.61
SRR27533696_1	516677549	150 bp	0.41	0.851	411852257	202 bp	0.41
SRR27533696_2	516677549	150 bp	0.41
Table S9b: Mapping results against Mycobacterium leprae strain MRHRU-235-G (CP029543.1)
Sample Name	Nr. Input Reads	Length Input Reads	% GC Input Reads	% Trimmed	Nr. Processed Reads	Length Processed Reads	% GC Processed Reads	Nr. Reads Into Mapping	Nr. Mapped Reads	Endogenous DNA (%)	Nr. Mapped Reads Passed Post-Filter	Endogenous DNA Post (%)	% Dup. Mapped Reads	5 Prime C>T 1st base	5 Prime C>T 2nd base	Mean Length Mapped Reads	Median read length	Nr. Dedup. Mapped Reads	Mean cov	Median cov	≥ 1X	≥ 2X	≥ 3X	≥ 4X	≥ 5X	% GC Dedup. Mapped Reads
M_lepromatosis_FJ924_S_4_SAMN39327841-SRR27533696								411852257	160062	0.04	158924	0.04	0.282	0	0	196.97bp	198.00bp	114186	7.1X	7.0X	0.995	0.986	0.963	0.913	0.825	0.59
SRR27533696_1	516677549	150 bp	0.41	0.851	411852257	202 bp	0.41
SRR27533696_2	516677549	150 bp	0.41

## Sheet: Supplementary Table S10
Table S10 - Comparison between M. lepromatosis FJ924 and M. leprae MRHRU 235.G, the respective representative genomes for their species
Genomes were converted to synthetic reads using BBmap's randomread.sh tool, with an average size of 50bp and a depth of 20x. Synthetic reads were subsequently mapped with bwa aln through the nf-core/eager pipeline with the additional parameters -n 0.1 and -l 32
Table S10A - mapping of M. leprae MRHRU 235.G against M. Lepromatosis FJ924
Sample Name	Nr. Input Reads	Length Input Reads	% GC Input Reads	% Trimmed	Nr. Processed Reads	Length Processed Reads	% GC Processed Reads	Nr. Reads Into Mapping	Nr. Mapped Reads	Endogenous DNA (%)	Nr. Mapped Reads Passed Post-Filter	Endogenous DNA Post (%)	% Dup. Mapped Reads	5 Prime C>T 1st base	5 Prime C>T 2nd base	Mean Length Mapped Reads	Median read length	Nr. Dedup. Mapped Reads	Mean cov	Median cov	≥ 1X	≥ 2X	≥ 3X	≥ 4X	≥ 5X	% GC Dedup. Mapped Reads
Mycobacterium_leprae_MRHRU-235-G	637422	50 bp	0.57	0.216	553166	47 bp	0.57	553166	115267	20.84	58254	10.53	0.03	0.012	0.011	44.47bp	42.00bp	56490	0.8X	0.0X	0.236	0.161	0.116	0.084	0.06	0.61
Table S10B - mapping of M. Lepromatosis FJ924 against M. leprae MRHRU 235.G
Sample Name	Nr. Input Reads	Length Input Reads	% GC Input Reads	% Trimmed	Nr. Processed Reads	Length Processed Reads	% GC Processed Reads	Nr. Reads Into Mapping	Nr. Mapped Reads	Endogenous DNA (%)	Nr. Mapped Reads Passed Post-Filter	Endogenous DNA Post (%)	% Dup. Mapped Reads	5 Prime C>T 1st base	5 Prime C>T 2nd base	Mean Length Mapped Reads	Median read length	Nr. Dedup. Mapped Reads	Mean cov	Median cov	≥ 1X	≥ 2X	≥ 3X	≥ 4X	≥ 5X	% GC Dedup. Mapped Reads
Mycobacterium_lepromatosis_FJ924	654338	50 bp	0.57	0.217	567711	47 bp	0.57	567711	115329	20.31	58150	10.24	0.03	0.011	0.013	44.45bp	42.00bp	56423	0.8X	0.0X	0.243	0.165	0.119	0.086	0.061	0.61

[truncated: 5 more sheets: Supplementary Table S11, Supplementary Table S12, Supplementary Table S13, Supplementary Table S14, Supplementary Table S15]
